# Supplementary material for: Genome-Wide Transcriptional Response of Silkworm (Bombyx mori) to Infection by the Microsporidian Nosema bombycis
Source: PLoS One. 2013 Dec 30;8(12):e84137. doi: 10.1371/journal.pone.0084137 (PMC3875524; doi:10.1371/journal.pone.0084137)
Supplement: Table S9 — Ratio of silkworm immune-related genes induced by different pathogens. (XLS) [file pone.0084137.s013.xls]

## Sheet: Sheet1
Table S9 Ratio of silkworm immune-related genes induced by different pathogenes
Probe/Gene ID	Name	Nb 2d	Nb 4d	Nb 6d	Nb 8d	E.coli 3h	E.coli 6h	E.coli 12h	E.coli 24h	NPV 3h	NPV 6h	NPV 12h	NPV 24h	Bb 3h	Bb 6h	Bb 12h	Bb 24h	B.ba 6h	B.ba 12h	B.ba 24h	B.ba 48h
Recognition
sw17404	BmPGRP-S1	/	/	/	/	/	/	/	/	/	/	/	0.40525	/	/	/	/	0.3414	/	/	/
sw21727	BmPGRP-S2	/	/	/	/	/	/	/	2.85925	/	0.4317	/	/	/	/	/	4.88565	/	/	4.33765	2.52325
sw22599 *	BmPGRP-S3	/	/	/	17.5859	/	/	/	/	/	/	/	/	/	/	/	/	/	/	/	/
sw17703 *	BmPGRP-S4	2.2579	/	/	18.7991	/	/	/	/	/	/	/	/	/	/	/	/	/	/	/	/
sw20314	BmPGRP-S5	/	/	/	/	0.3945	/	/	12.7901	/	/	0.39015	0.23205	/	/	0.338	3.50685	0.16325	/	/	3.1178
sw09651	BmPGRP-L1	/	/	0.3478	/	/	/	/	/	/	/	/	/	/	/	/	/	/	/	2.16295	/
sw10605	βGRP2	/	/	/	3.1389	/	/	/	3.01255	/	/	/	0.3749	/	/	/	/	/	/	/	/
sw20413 *	βGRP4	/	2.2322	4.3038	5.721	/	/	/	/	/	/	/	/	/	/	/	/	/	/	/	/
sw22339	BmSCRB2	/	/	/	/	/	/	/	/	/	/	/	0.41135	/	/	/	/	/	/	/	/
sw04759	BmSCRB3	/	/	/	/	/	/	/	/	/	2.2197	/	/	/	/	/	0.4505	/	/	/	/
sw01562	BmSCRB4	/	/	/	/	/	/	/	/	/	/	/	/	/	/	/	0.472	/	/	/	/
sw20178	BmSCRB10	/	/	/	/	0.222	/	/	/	/	0.2961	/	5.0563	2.46505	/	/	/	0.43295	0.2565	/	/
sw05439	BmSCRB11	/	/	/	/	/	/	/	/	/	2.3736	/	/	/	/	/	0.36405	/	/	/	/
sw11640	BmSCRB12	/	/	/	/	0.2989	/	/	/	0.242	/	/	0.3373	0.316	/	0.4431	0.25285	/	/	0.30805	/
sw20070	BmSCRC	/	/	/	/	/	/	/	0.4997	/	2.092	/	/	/	/	/	0.2883	/	/	0.38735	/
sw05844 *	BmSCRASP4	/	/	0.09	0.235	/	/	/	/	/	/	/	/	/	/	/	/	/	/	/	/
sw22236 *	BmSCRB9	/	/	/	2.2343	/	/	/	/	/	/	/	/	/	/	/	/	/	/	/	/
sw01521	BmCTL12	/	/	/	/	/	/	2.1617	/	/	4.3328	/	/	/	/	/	2.315	/	2.99275	3.00745	/
sw07855	BmCTL16	/	/	0.373167	0.0342	/	/	/	/	/	/	/	/	/	/	/	/	/	/	3.0567	/
sw03832 *	BmCTL4	/	/	0.035467	0.022	/	/	/	/	/	/	/	/	/	/	/	/	/	/	/	/
sw15689 *	BmCTL5	/	/	/	0.1088	/	/	/	/	/	/	/	/	/	/	/	/	/	/	/	/
sw15509 *	BmCTL7	/	/	0.104333	/	/	/	/	/	/	/	/	/	/	/	/	/	/	/	/	/
sw09190 *	BmCTL9	/	/	0.182767	0.4371	/	/	/	/	/	/	/	/	/	/	/	/	/	/	/	/
sw22902 *	BmCTL11	/	5.7761	10.7439	17.3349	/	/	/	/	/	/	/	/	/	/	/	/	/	/	/	/
sw21899	BmCTL11	/	/	9.971	/	/	/	/	/	/	/	/	/	2.30675	/	/	/	/	/	/	2.08155
sw00143 *	BmCTL15	/	/	0.0598	/	/	/	/	/	/	/	/	/	/	/	/	/	/	/	/	/
sw08273 *	BmCTL18	/	/	/	0.0838	/	/	/	/	/	/	/	/	/	/	/	/	/	/	/	/
sw09844	BmTEPLP3	/	/	/	/	/	/	/	/	/	/	/	/	/	/	/	0.4109	/	/	/	/
Signal transduction
sw16610 *	BmSpz2	2.44147	/	0.107567	0.0922	/	/	/	/	/	/	/	/	/	/	/	/	/	/	/	/
sw05360 *	Toll-10	/	/	/	2.52	/	/	/	/	/	/	/	/	/	/	/	/	/	/	/	/
Modulation
sw20743	BmCLIP4	/	/	/	/	/	/	/	/	/	2.3266	/	/	2.05	/	/	/	/	/	/	/
sw20339	BmCLIP13	/	/	/	/	/	/	/	0.4968	/	/	/	/	/	/	/	0.30245	/	/	0.39475	0.4556
sw20515	BmCLIP15	/	/	/	/	/	/	/	2.22715	/	0.2166	/	/	0.0311	/	/	/	/	/	/	/
sw20945 *	BmCLIP7	/	/	/	2.427	/	/	/	/	/	/	/	/	/	/	/	/	/	/	/	/
sw22653 *	BmCLIP12	/	/	/	2.2868	/	/	/	/	/	/	/	/	/	/	/	/	/	/	/	/
sw20515 *	BmCLIP15	/	/	/	0.0366	/	/	/	/	/	/	/	/	/	/	/	/	/	/	/	/
sw15390 *	BmPPAE2	/	/	/	0.1159
sw20327 *	BmPPAE	/	/	2.13217	2.1213
sw16538	BmSPN11	/	/	/	/	/	2.07225	/	4.70535	/	/	/	/	/	/	0.47005	/	/	/	/	0.31995
sw16168	BmSPN19	/	/	2.97283	3.3472	/	/	/	2.6122	/	/	/	/	2.07915	/	/	/	/	/	2.00885	/
sw11925 *	BmSPN1	/	/	/	3.5359	/	/	/	/	/	/	/	/	/	/	/	/	/	/	/	/
sw18472 *	BmSPN2	/	/	/	2.1283	/	/	/	/	/	/	/	/	/	/	/	/	/	/	/	/
BGIBMGA010212 *	BmSPN3	/	/	/	2.0677	/	/	/	/	/	/	/	/	/	/	/	/	/	/	/	/
sw16003 *	BmSPN6	/	/	0.156467	/	/	/	/	/	/	/	/	/	/	/	/	/	/	/	/	/
sw19598 *	BmSPN8	/	0.4896	0.431533	5.7162	/	/	/	/	/	/	/	/	/	/	/	/	/	/	/	/
sw22015 *	BmSPN12	/	0.4873	0.083533	0.0397	/	/	/	/	/	/	/	/	/	/	/	/	/	/	/	/
sw22273 *	BmSPN12	/	/	0.050767	0.0562	/	/	/	/	/	/	/	/	/	/	/	/	/	/	/	/
sw13114 *	BmSPN16	/	/	0.032833	0.068	/	/	/	/	/	/	/	/	/	/	/	/	/	/	/	/
sw19259 *	BmSPN18	/	/	0.044567	0.2169	/	/	/	/	/	/	/	/	/	/	/	/	/	/	/	/
sw06085 *	BmSPN20	/	/	0.0663	/	/	/	/	/	/	/	/	/	/	/	/	/	/	/	/	/
sw11465 *	BmSPN21	/	/	0.063733	/	/	/	/	/	/	/	/	/	/	/	/	/	/	/	/	/
BGIBMGA013848 *	BmSPN22	/	/	/	0.2036	/	/	/	/	/	/	/	/	/	/	/	/	/	/	/	/
sw16035 *	BmSPN25	/	/	/	2.0268	/	/	/	/	/	/	/	/	/	/	/	/	/	/	/	/
Effectors
sw13847	BmLYS1	2.19143	2.268	0.467667	2.1552	0.33275	/	0.3439	/	/	/	/	0.2353	/	/	/	/	/	2.01005	/	/
sw00728	BmLYS2	/	/	4.00013	2.8117	/	/	/	/	/	/	/	/	2.19	/	/	/	/	/	/	/
sw01851	BmLYS3	/	/	/	2.2158	/	/	/	/	/	0.33995	/	/	/	/	/	/	/	/	2.69665	/
sw21973	BmPPO1	/	/	0.4551	/	/	/	/	/	/	6.0489	/	/	/	2.37095	2.32345	0.2085	/	/	0.1429	0.3439
sw05534	BmPPO2	/	/	/	/	/	/	/	/	/	4.0017	/	/	/	2.32265	2.10675	/	/	/	/	0.45585
sw17805	Attacin	2.99137	/	0.286933	/	0.2147	/	0.31455	2.9579	/	/	/	0.2781	/	0.4119	/	/	0.2885	/	/	/
sw21459	Enbocin	/	/	/	/	/	2.141	0.2403	4.68515	0.1604	0.24915	0.2991	0.18085	/	0.1754	0.29065	3.3526	/	2.2534	/	2.68245
sw22043	Gloverin	3.5001	/	/	2.6712	0.2833	/	0.31395	3.7527	/	/	0.3084	0.1298	/	/	/	3.4076	0.1648	2.1397	2.5294	/
sw08844	Lebocin	2.16167	/	2.89247	4.3776	0.32745	/	0.45895	2.86615	/	/	/	0.28285	/	/	/	2.0759	0.38555	/	/	/
sw15815	Moricin	/	3.6581	0.1319	/	/	/	/	10.3559	/	/	0.4914	0.3112	2.1127	/	/	8.1517	0.22035	/	2.872	2.9478
BGIBMGA013866 *	Gloverin 4-like	5.35813	2.9471	5.87147	16.6843	/	/	/	/	/	/	/	/	/	/	/	/	/	/	/	/
BGIBMGA013865 *	Gloverin A1	7.06943	/	9.0105	/	/	/	/	/	/	/	/	/	/	/	/	/	/	/	/	/
sw12523 *	Gloverin A6	4.22823	3.0304	/	2.4926	/	/	/	/	/	/	/	/	/	/	/	/	/	/	/	/
BGIBMGA013864 *	Gloverin A4	4.08673	/	/	/	/	/	/	/	/	/	/	/	/	/	/	/	/	/	/	/
sw11372 *	Cecropin B	/	/	0.032567	0.0732	/	/	/	/	/	/	/	/	/	/	/	/	/	/	/	/
BGIBMGA000017 *	Cecropin D1	2.26933	/	0.392167	/	/	/	/	/	/	/	/	/	/	/	/	/	/	/	/	/
sw09761 *	Moricin like-C2	/	4.289	4.69583	3.2698	/	/	/	/	/	/	/	/	/	/	/	/	/	/	/	/
sw11016 *	Moricin like-B6	/	/	4.12737	2.0624	/	/	/	/	/	/	/	/	/	/	/	/	/	/	/	/
* N. bombycis specific genes. Red box and green box indicated up-regulation and down-regulation of the gene, respectively. Nb, NPV, Bb and B.ba represented Nosema bombycis, nuclear polyhedrosis virus, Bacillus bombyseptieus and Beauveria bassiana, respectively.
